# Supplementary material for: Evaluation of Population Pharmacokinetic Models of Micafungin: Implications for Dosing Regimen Optimization in Critically Ill Patients
Source: Preprints.org preprint supplement (doi:10.20944/preprints202407.0830.v1), 2024-07-10
Supplement: Supplementary file 1 [file supplementary]

**
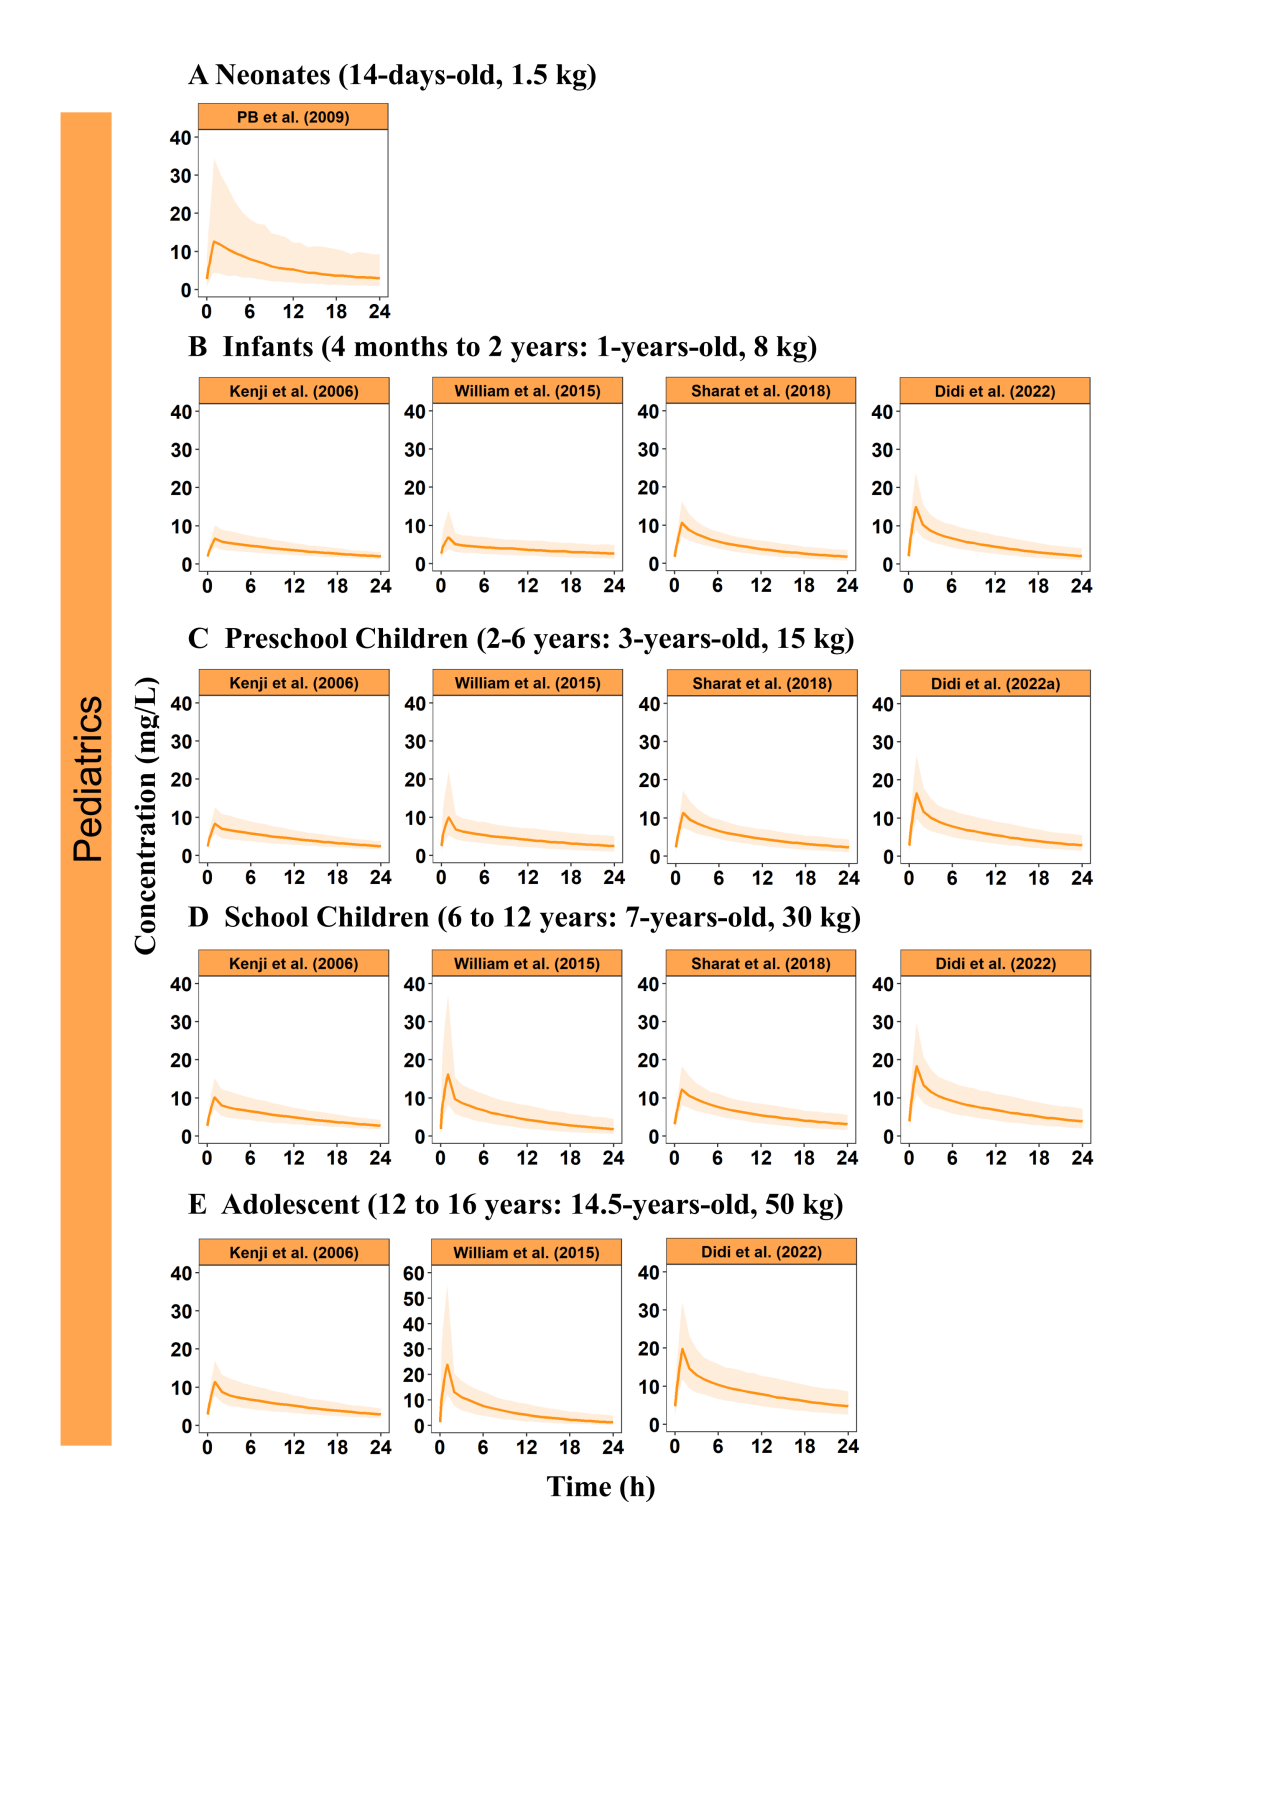
**

**Figure S1.** Concentration-time profiles of micafungin for (**A**) neonates, (**B**) infants, (**C**) preschool children, (**D**) school children and (**E**) adolescents at steady state. The solid orange lines represent the median of the simulated concentration-time profiles and the light orange shadows represent the 5th–95th percentiles of the concentration-time profiles.


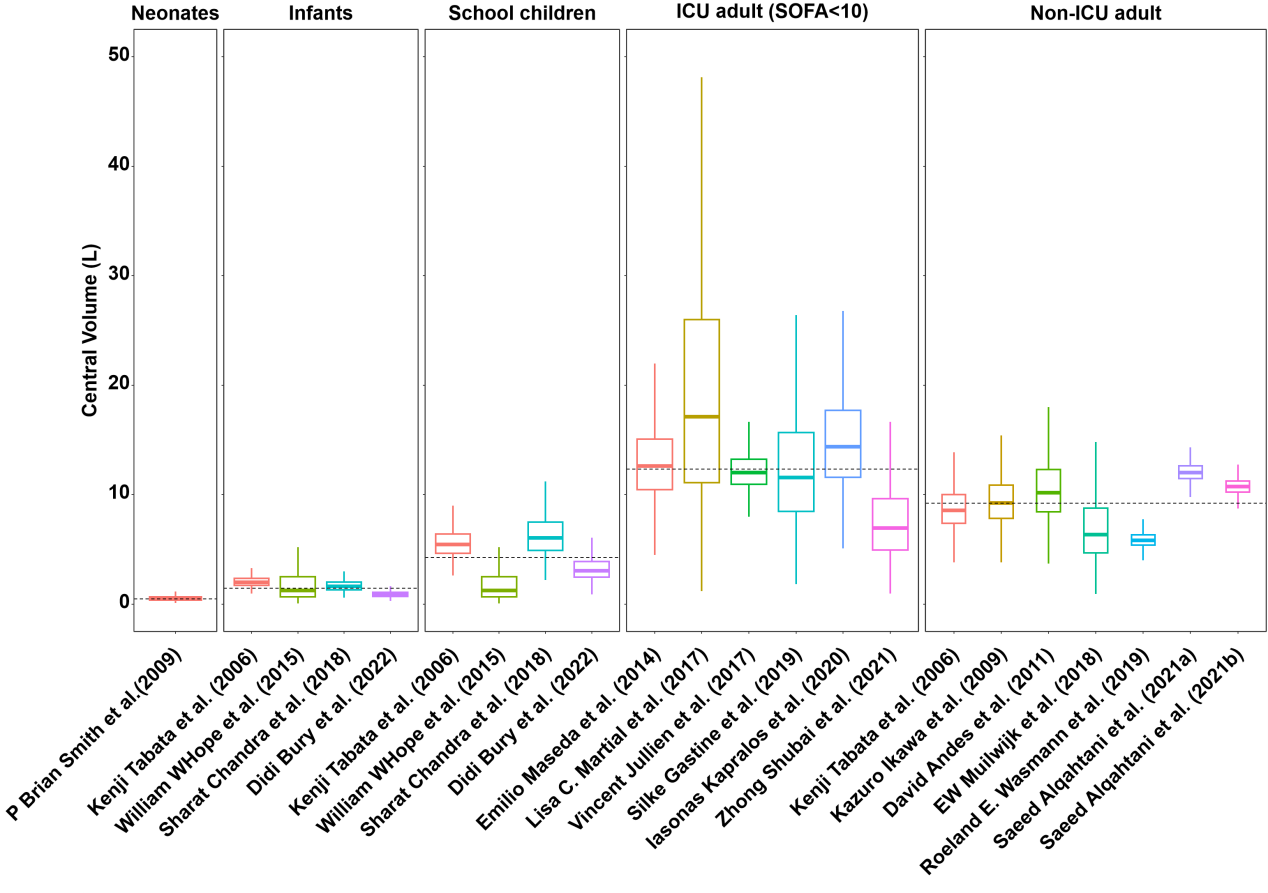


**Figure S2.** Distribution of the central volume of micafungin in various typical virtual populations. The typical ICU adults (SOFA<10) were set at male, 40-years-old, 70kg, and had the following demographic parameters: ALT or AST, 25 IU/L; ALB, 40 g/L; SOFA, 7; The typical Non-ICU adults were set at male, 40-years-old, 70kg, and had the following demographic parameters: ALT or AST, 25 IU/L; ALB, 40 g/L; SOFA, 0. The dashed and dotted lines in each panel represent the medians of the clearance in each corresponding population, respectively.


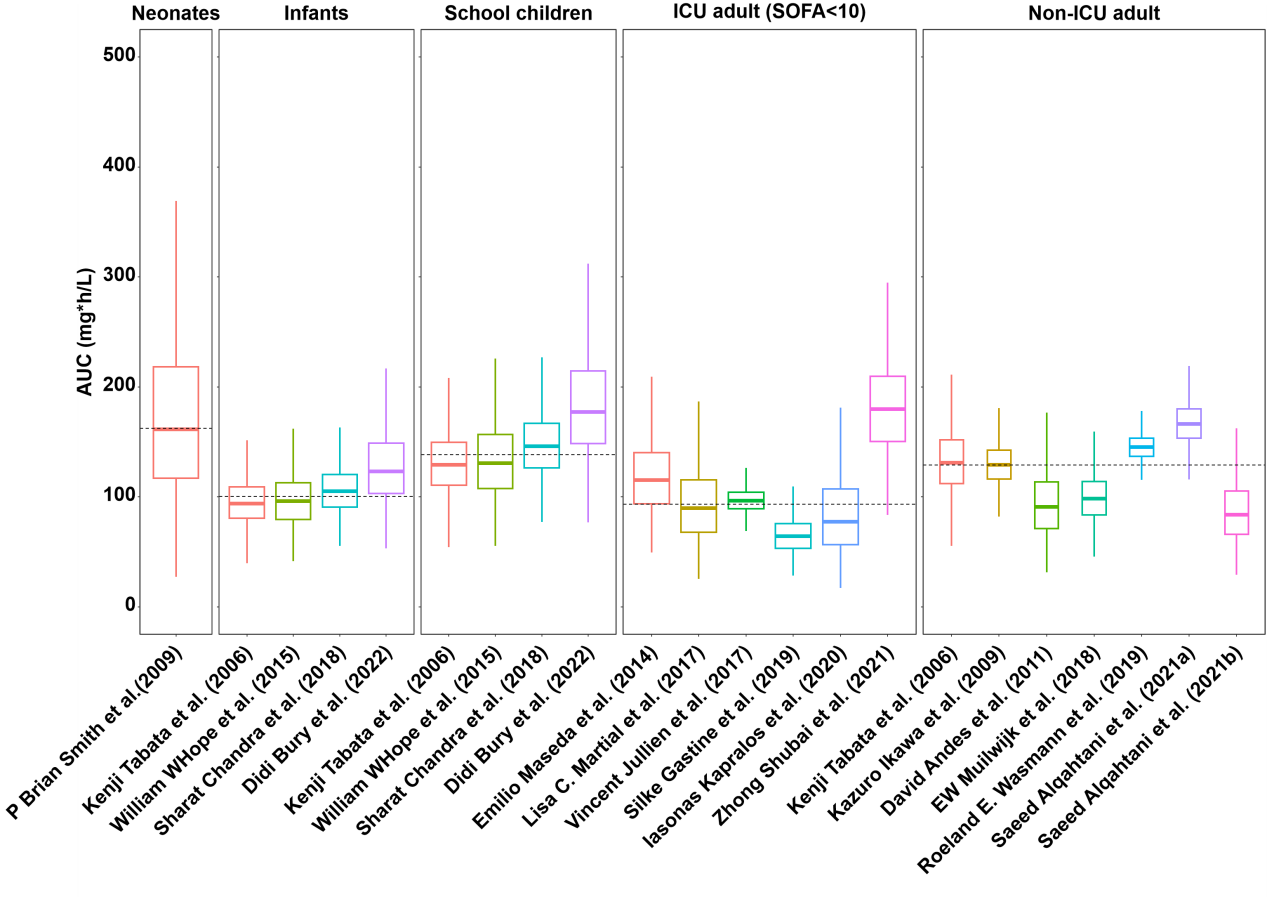


**Figure S3.** Distribution of the AUC24 of micafungin in various typical virtual populations. The typical ICU adults (SOFA<10) were set at male, 40-years-old, 70kg, and had the following demographic parameters: ALT or AST, 25 IU/L; ALB, 40 g/L; SOFA, 7; The typical Non-ICU adults were set at male, 40-years-old, 70kg, and had the following demographic parameters: ALT or AST, 25 IU/L; ALB, 40 g/L; SOFA, 0. The dashed and dotted lines in each panel represent the medians of the clearance in each corresponding population, respectively.


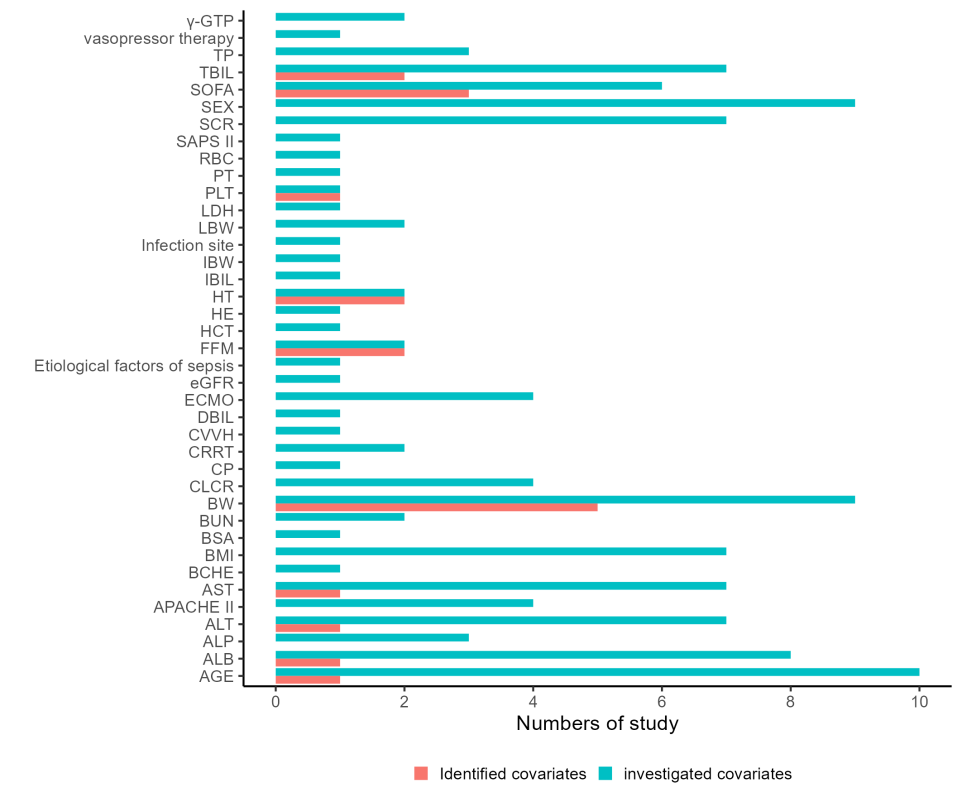


**Figure S4.** The histogram of the amount of investigated and identified covariates in included studies. AGE, age; HT, height; LBW or FFM, lean body weight; IBW, idea body weight; TBW or BW, Total body weight; BSA, body surface area; BMI, body mass index; ALP, alkaline phosphatase; BCHE, butyrylcholinesterase; CVVH, Continuous Veno-Venous Hemofiltration; HE, haemodialysis; RBC, red blood cell count; HCT, hematocrit; PLT, platelet count; eGFR, estimated glomerular filtration rate; CLCR, creatinine clearance; SCR, serum creatinine; CRRT, continuous renal replacement therapy; TP, total protein; ALB, albumin; BUN, blood urea nitrogen; TBILI, total bilirubin; DBIL, direct bilirubin; IBIL, indirect bilirubin; ALT, alanine amino transferase or glutamic pyruvic oxaloacetate transaminase/aspartate aminotransferase; AST, aspartate aminotransferase;γ-GTP, glutamate dehydrogenase; LDH, lactate dehydrogenase; SOFA, Sepsis-related organ failure assessment score, SAPS II, Simplifed Acute Physiology Score; CP, Child-Pugh score.


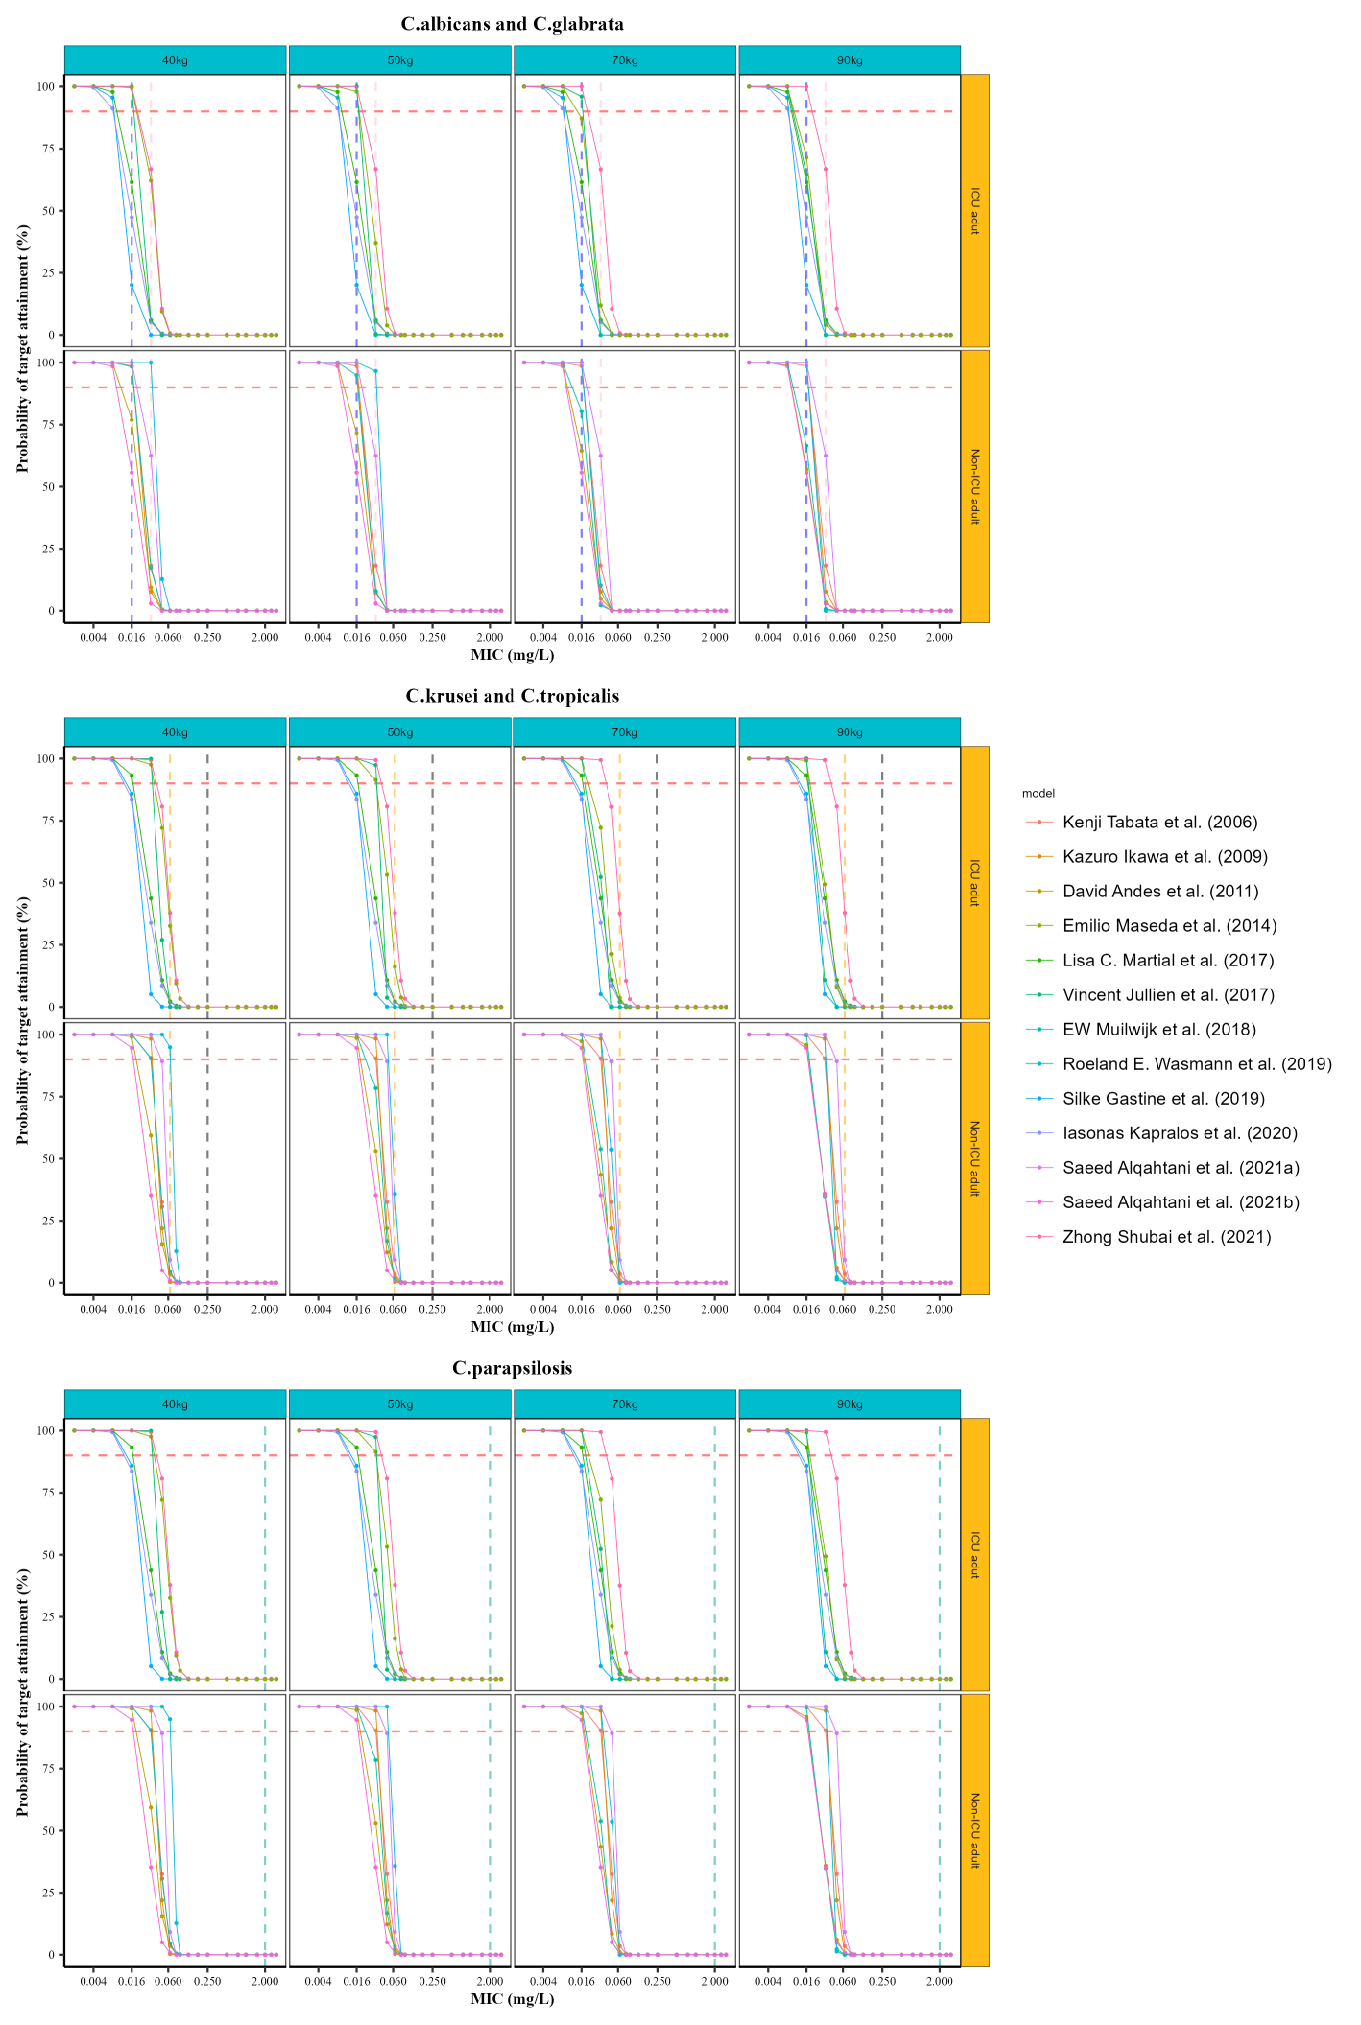


**Figure S5.** The probability target achievement of micafungin for ICU adults or Non-ICU adults against *C. Albicans*, *C. glabrata*, *C. Krusei*, *C. tropicalis* and *C. parapsilosis* in included studies. The MIC breakpoints for *C. Albicans* (blue), *C. glabrata* (pink), *C. Krusei* (black), *C. tropicalis* (orange) and *C. parapsilosis* (green) are marked with dashed and dotted lines in each panel, respectively. A PTA target of 90% is highlighted with red dashed and dotted lines.

**Table S1.** Demographic information of simulated patients.

|  |  | median | min | max |
| --- | --- | --- | --- | --- |
| Adults | |  |  |  |
| Non-ICU group | |  | | |
|  | Sex | Male | | |
|  | Age (years) | 40 | 20 | 80 |
|  | Body weight (kg) | 70 | 40 | 150 |
|  | Fat-free weight (kg) | 57.2 | 39.7 | 83.3 |
|  | Height (cm) | 180 | 150 | 190 |
|  | Body mass index (kg/m2) | 20 | 18 | 30 |
|  | Platelet count (104/μL) | 21.6 | 12.5 | 35 |
|  | Infusion rate (mg/h) | 100 |  |  |
| I | Non-ICU |  |  |  |
|  | Alanine aminotransferase (U/L) | 25 | 0 | 50 |
|  | Aspartate aminotransferase (U/L) | 25 | 0 | 50 |
|  | Total bilirubin (μmol/L) | 12 | 0 | 17.1 |
|  | Albumin (/min) | 40 | 20 | 60 |
|  | Sepsis related organ failure assessment score | 7 | 0 | 19 |
| II | ICU |  |  |  |
|  | Alanine aminotransferase (U/L) | 50 | 0 | 199 |
|  | Aspartate aminotransferase (U/L) | 50 | 0 | 340 |
|  | Total bilirubin (μmol/L) | 70 | 0 | 100 |
|  | Albumin (/min) | 24 | 9 | 66 |
|  | Sepsis related organ failure assessment (SOFA) score | 11 | 0 | 19 |
| Children | |  |  |  |
| I | Neonate (≤1 month) |  |  |  |
|  | Sex | Male |  |  |
|  | Age (years) | 0.04 | 0.003 | 0.08 |
|  | Body weight (kg) | 1.5 | 0.5 | 2.5 |
|  | Fat-free weight (kg) | 1.6 | 0.63 | 2.3 |
|  | Height (cm) | 40 | 20 | 50 |
|  | Body mass index (kg/m2) |  |  |  |
| II | infants (4 months to 2 years) |  |  |  |
|  | Sex | Male |  |  |
|  | Age (years) | 1.0 | 0.6 | 1.4 |
|  | Body weight (kg) | 8 | 6 | 10 |
|  | Fat-free weight (kg) | 7.79 | 6.31 | 9.06 |
|  | Height (cm) | 78 | 60 | 96 |
|  | Body mass index (kg/m2) | 13 | 10 | 30 |
| III | Preschool Children (2 to 6 years) |  |  |  |
|  | Sex | Male |  |  |
|  | Age (years) | 3.7 | 2.5 | 4.9 |
|  | Body weight (kg) | 15 | 10 | 20 |
|  | Fat-free weight (kg) | 13.88 | 10.41 | 16.65 |
|  | Height (cm) | 98.5 | 87 | 110 |
|  | Body mass index (kg/m2) | 15 | 10 | 30 |
| IV | School Children (6 to 12 years) |  |  |  |
|  | Sex | Male |  |  |
|  | Age (years) | 9 | 8.5 | 10.5 |
|  | Body weight (kg) | 30 | 20 | 40 |
|  | Fat-free weight (kg) | 26 | 20.07 | 31.44 |
|  | Height (cm) | 130 | 115 | 145 |
|  | Body mass index (kg/m2) | 17 | 10 | 30 |
| V | Adolescent (12 to 16 years) |  |  |  |
|  | Sex | Male |  |  |
|  | Age (years) | 14.5 | 13 | 16 |
|  | Body weight (kg) | 50 | 37 | 70 |
|  | Fat-free weight (kg) | 42.53 | 34.99 | 51.56 |
|  | Height (cm) | 160 | 150 | 170 |
|  | Body mass index (kg/m2) | 19 | 10 | 30 |

# Table S2. Checklist for literature quality when reporting a clinical pharmacokinetic study.

|  | **Item** | **Kenji Tabata**  **et al.**  **(2006)** | **Kazuro Ikawa**  **et al.**  **(2009)** | **P Brian Smith**  **et al. (2009)** | **David Andes**  **et al.**  **(2011)** | **Emilio**  **Maseda**  **et al.**  **(2014）** | **William W. Hope**  **et al. (2015)** | **Lisa C. Martial et al. (2017)** | **Vincent Jullien et al. (2017)** | **E. W. Muilwijk et al. (2018)** | **Sharat Chandra et al. (2018)** | **Roeland E. Wasmann et al. (2019)** | **Silke Gastine et al. (2019)** | **Zhong Shubai et al. (2019)** | **Iasonas Kapralos et al. (2020)** | **Saeed Alqahtani et al. (2021a)** | **Saeed Alqahtani et al. (2021b)** |
| --- | --- | --- | --- | --- | --- | --- | --- | --- | --- | --- | --- | --- | --- | --- | --- | --- | --- |
| 1 | Drug and patient population | 1 | 1 | 1 | 1 | 1 | 1 | 1 | 1 | 1 | 1 | 1 | 1 | 1 | 1 | 1 | 1 |
| 2 | The name of the drug(s) studied, the route of administration, the population in whom it was studied, and the results of the primary objective and major clinical pharmacokinetic findings | 1 | 1 | 1 | 1 | 1 | 1 | 1 | 1 | 1 | 1 | 1 | 1 | 1 | 1 | 1 | 1 |
| 3 | Pharmacokinetic data | 1 | 1 | 1 | 1 | 1 | 1 | 1 | 1 | 1 | 1 | 1 | 1 | 1 | 1 | 1 | 1 |
| 4 | An explanation of the study rationale | 1 | 1 | 1 | 1 | 1 | 1 | 1 | 1 | 1 | 1 | 1 | 1 | 1 | 1 | 1 | 1 |
| 5 | Specific objectives or hypotheses | 1 | 1 | 1 | 1 | 1 | 1 | 1 | 1 | 1 | 1 | 1 | 1 | 1 | 1 | 1 | 1 |
| 6 | Eligibility criteria of study participants | 1 | 1 | 1 | 1 | 1 | 1 | 1 | 1 | 1 | 1 | 1 | 1 | 1 | 1 | 1 | 1 |
| 7 | Co-administration with other potentially interacting drugs or food | 0 | 0 | 0 | 0 | 1 | 1 | 1 | 0 | 1 | 0 | 0 | 0 | 0 | 0 | 0 | 0 |
| 8 | Drug preparation and administration characteristics including dose, route, formulation, infusion duration (if applicable) and frequency | 1 | 1 | 1 | 1 | 1 | 1 | 1 | 1 | 1 | 1 | 1 | 1 | 1 | 1 | 1 | 1 |
| 9 | Body fluid or tissue sampling (timing, frequency and storage) for quantitative drug measurement | 1 | 1 | 1 | 1 | 1 | 1 | 1 | 1 | 1 | 1 | 1 | 1 | 1 | 1 | 1 | 1 |
| 10 | Quantitative bioanalytical methods | 1 | 1 | 1 | 0 | 1 | 1 | 1 | 1 | 1 | 1 | 1 | 1 | 1 | 1 | 1 | 1 |
| 11 | Methods for handling missing data | 1 | 0 | 0 | 0 | 0 | 1 | 1 | 1 | 0 | 0 | 0 | 0 | 0 | 0 | 0 | 0 |
| 12 | Modelling software | 1 | 1 | 1 | 1 | 1 | 1 | 1 | 1 | 1 | 1 | 1 | 1 | 1 | 1 | 1 | 1 |
| 13 | Statistical methods and software | 1 | 1 | 1 | 1 | 1 | 1 | 1 | 1 | 1 | 1 | 1 | 1 | 1 | 1 | 1 | 1 |
| 14 | Candidate strutural models | 1 | 1 | 1 | 1 | 1 | 1 | 1 | 1 | 1 | 0 | 1 | 1 | 1 | 1 | 1 | 1 |
| 15 | Residual error struture | 1 | 1 | 1 | 1 | 1 | 1 | 1 | 1 | 1 | 1 | 1 | 1 | 1 | 1 | 1 | 1 |
| 16 | Methods for base model determination | 1 | 1 | 1 | 1 | 1 | 1 | 1 | 1 | 1 | 1 | 1 | 1 | 1 | 1 | 1 | 1 |
| 17 | Methods for base model evaluation | 1 | 1 | 1 | 0 | 1 | 1 | 1 | 1 | 1 | 1 | 1 | 1 | 1 | 1 | 1 | 1 |
| 18 | Covariates analysis strategy | 1 | 0 | 0 | 1 | 1 | 1 | 1 | 1 | 1 | 1 | 1 | 1 | 1 | 1 | 1 | 1 |
| 19 | Methods for final model evaluation | 1 | 1 | 1 | 1 | 1 | 1 | 1 | 1 | 1 | 1 | 1 | 1 | 1 | 1 | 1 | 1 |
| 20 | Distribution of individual model parameters | 0 | 1 | 1 | 1 | 1 | 1 | 1 | 1 | 1 | 1 | 1 | 1 | 1 | 1 | 1 | 1 |
| 21 | Estimation methods | 1 | 1 | 1 | 1 | 1 | 1 | 1 | 1 | 1 | 1 | 1 | 1 | 1 | 1 | 1 | 1 |
| 22 | Population characteristics | 1 | 1 | 1 | 1 | 1 | 1 | 1 | 1 | 1 | 1 | 1 | 1 | 1 | 1 | 1 | 1 |
| 23 | Schematic of the final model | 0 | 0 | 0 | 0 | 0 | 1 | 0 | 0 | 0 | 0 | 0 | 0 | 0 | 0 | 0 | 0 |
| 24 | Number of subjects and observations | 1 | 1 | 1 | 1 | 1 | 1 | 1 | 1 | 1 | 1 | 1 | 1 | 1 | 1 | 1 | 1 |
| 25 | Table of the final model parameter | 1 | 1 | 1 | 1 | 1 | 1 | 1 | 1 | 1 | 1 | 1 | 1 | 1 | 1 | 1 | 1 |
| 26 | Final model evaluation plots | 1 | 1 | 0 | 0 | 1 | 1 | 1 | 1 | 1 | 1 | 1 | 1 | 1 | 1 | 1 | 1 |
| 27 | Summary of the model-building process and the derived final model | 1 | 0 | 0 | 1 | 1 | 1 | 1 | 1 | 1 | 0 | 1 | 1 | 1 | 1 | 1 | 1 |
| 28 | Plot of concentration versus times and/or effect versus concentration | 1 | 0 | 1 | 0 | 1 | 1 | 1 | 0 | 0 | 1 | 1 | 1 | 1 | 0 | 0 | 0 |
| 29 | Study limitation | 0 | 1 | 1 | 1 | 1 | 1 | 1 | 1 | 1 | 1 | 1 | 1 | 1 | 1 | 1 | 1 |
| 30 | Study findings | 1 | 1 | 1 | 1 | 1 | 1 | 1 | 1 | 1 | 1 | 1 | 1 | 1 | 1 | 1 | 1 |
|  | Total score | 26 | 24 | 24 | 23 | 28 | 30 | 29 | 27 | 27 | 25 | 27 | 27 | 27 | 26 | 26 | 26 |
|  | **Compliance** | **86.67%** | **80.00%** | **80.00%** | **76.67%** | **93.33%** | **100.00%** | **96.67%** | **90.00%** | **90.00%** | **83.33%** | **90.00%** | **90.00%** | **90.00%** | **86.67%** | **86.67%** | **86.67%** |

**Table S3.** List of tested and significant covariates in the included models.

| **Study**  **(publication year)** | **Tested covariates** | | | **Covariate selection** | | **Significant covariates** | |
| --- | --- | --- | --- | --- | --- | --- | --- |
| **Demographic** | **Laboratory tests** | **Co-administration** | **Forward inclusion** | **Backward elimination** | ***CL*** | ***V*** |
| Kenji Tabata (2006) | SEX, AGE, WT, BMI | RBC, HCT, PLT, TP,  ALB, BUN, TBIL,  ALT, AST, γ-GTP,  LDH, ALP, CRCl,  SCR, | NR | *P* < 0.05 | *P* < 0.001 | AGE, WT, PLT | NR |
| Kazuro Ikawa （2009） | NR | NR | NR | *P* < 0.05 | *P* < 0.05 | NR | NR |
| P Brian Smith (2009) | NR | NR | NR | *P* < 0.05 | *P* < 0.05 | NR | NR |
| David Andes (2011) | BW | NR | NR | *P* < 0.05 | *P* < 0.001 | BW | NR |
| Emilio Maseda (2014) | AGE, SEX, BW | TBIL, SCR, BUN | vasopressor therapy | *P* < 0.05 | *P* < 0.05 | BW | NR |
| William W. Hope (2015) | AGE, SEX | ALB, PLT, RBC, SCR, ALT, AST, TBIL | NR | *P* < 0.05 | *P* < 0.01 | BW, AST, TBIL | BW |
| Lisa C. Martial (2017) | NR | ALB, CVVH, SOFA | NR | *P* < 0.05 | *P* < 0.05 | NR | NR |
| Vincent Jullien (2017) | AGE, SEX, BW | TP, ALT, AST, ALP, ALB, TBIL, PT, SOFA, ECMO, HE | NR | *P* < 0.05 | *P* < 0.01 | BW, ALB, SOFA | BW, ALB |
| E.W. Muilwijk （2018） | FFM | NR | NR | *P* < 0.05 | *P* < 0.05 | FFM | FFM |
| Sharat Chandra (2018) | AGE, SEX, BW  BMI | APACHE II, SCR, CRCl, ALB | NR | *P* < 0.05 | *P* < 0.01 | BW | BW |
| Roeland E. Wasmann (2019) | SEX, AGE, TBW, LBW, IBW, BMI | NR | NR | *P* < 0.05 | *P* < 0.001 | TBW | TBW |
| Silke Gastine (2019) | SEX, WT, AGE  BMI | ALB, TP, CLCR, ALT, AST, BCHE, TBIL, APACHE II, SOFA, SAPS II | NR | *P* < 0.05 | *P* < 0.01 | TBIL | SOFA |
| Iasonas Kapralos (2020) | AGE, BW, HT  BSA, LBW, BWI | ALB, PLT, HCT, RBC, SCR, eGFR, ALT, AST, γ-GTP, AST, ALT, GGT, ALP, TBIL, SOFA, APACHE II, CRRT | NR | *P* < 0.05 | *P* < 0.01 | NR | NR |
| Saeed Alqahtani (2021) | SEX, AGE, BW, HT, BMI | SCR, CRCl, SOFA, AST, AST, TBIL, ALB | NR | *P* < 0.05 | *P* < 0.05 | NR | NR |
| Zhong Shubai (2021) | SEX, AGE, BW, BMI | ALT, AST, TP, SCR, TP, DBIL, IBIL, etiological factors of sepsis, infection site, CP, APACHE II, SOFA, CRRT | NR | *P* < 0.05 | *P* < 0.001 | ALT | SOFA |
| Didi Bury (2022) | FFM | FFM | NR | *P* < 0.05 | *P* < 0.05 | FFM | FFM |

SEX, sex; AGE, age; HT, height; TBW or BW, total body weight; LBW or FFM, lean body weight; IBW, idea body weight; BW, body weight; WT, weight; BSA, body surface area; BMI, body mass index; CVVH, Continuous Veno-Venous Hemofiltration; HE, haemodialysis; RBC, red blood cell count; HCT, hematocrit; PLT, platelet count; eGFR, estimated glomerular filtration rate; CL, total clearance; CLCR, creatinine clearance; SCR, serum creatinine; CRRT, continuous renal replacement therapy; TP, total protein; ALB, albumin; BUN, blood urea nitrogen; TBILI, total bilirubin; DBIL, direct bilirubin; IBIL, indirect bilirubin; ALT, alanine amino transferase or glutamic pyruvic oxaloacetate transaminase/aspartate aminotransferase; AST, aspartate aminotransferase;γ-GTP, glutamate dehydrogenase; LDH, lactate dehydrogenase; ALP, alkaline phosphatase; BCHE, butyrylcholinesterase, APACHE II, Acute Physiology and Chronic Health Evaluation II; SOFA, Sepsis-related organ failure assessment score, SAPS II, Simplifed Acute Physiology Score; CP, Child-Pugh score; Q, intercompartmental (central-peripheral) clearance; V, volume of distribution; Vc, volume of distribution of the central compartment; Vp, volume of distribution of the central compartment.

**Table S4.** The effect of covariates on the range of CL in each study.

| **Study** | **Covariates** | **Range of Covariates** | | **Reference value of CL** | **Range of CL (Ratio*)** | |
| --- | --- | --- | --- | --- | --- | --- |
| **Minimum** | **Maximum** | **Minimum** | **Maximum** |
| Kenji Tabata *et al*. (2006) | Weight (kg) | 6 | 10 | 0.17 | 0.14 (0.84) | 0.18 (1.06) |
| William W. Hope *et al*. (2015) | 6 | 10 | 0.16 | 0.13 (0.82) | 0.19 (1.18) |
| Sharat Chandra *et al*. (2018) | 6 | 10 | 0.15 | 0.12 (0.80) | 0.18 (1.17) |
| Didi Bury *et al*. (2022a)** | 6.31 | 9.06 | 0.13 | 0.11 (0.85) | 0.15 (1.12) |
| Kenji Tabata *et al*. (2006) | 10 | 20 | 0.27 | 0.19 (0.72) | 0.33 (1.22) |
| William W. Hope *et al*. (2015) | 10 | 20 | 0.27 | 0.20 (0.75) | 0.32 (1.19) |
| Sharat Chandra *et al*. (2018) | 10 | 20 | 0.25 | 0.17 (0.71) | 0.29 (1.20) |
| Didi Bury *et al*. (2022a)** | 10.41 | 16.65 | 0.25 | 0.20 (0.81) | 0.28 (1.15) |
| Kenji Tabata *et al*. (2006) | 20 | 40 | 0.47 | 0.39 (0.83) | 0.71 (1.51) |
| William W. Hope *et al*. (2015) | 20 | 40 | 0.48 | 0.40 (0.83) | 0.67 (1.39) |
| Sharat Chandra *et al*. (2018) | 20 | 40 | 0.41 | 0.35 (0.85) | 0.59 (1.42) |
| Didi Bury *et al*. (2022a)** | 20.07 | 31.44 | 0.38 | 0.34 (0.81) | 0.43 (1.14) |
| Kenji Tabata *et al*. (2006) | 37 | 70 | 0.78 | 0.57 (0.73) | 1.02 (1.31) |
| William W. Hope *et al*. (2015) | 37 | 70 | 0.69 | 0.55 (0.79) | 0.92 (1.33) |
| Didi Bury *et al*. (2022a)** | 34.99 | 51.56 | 0.54 | 0.47 (0.86) | 0.63 (1.16) |
| Kenji Tabata *et al*. (2006) | 40 | 150 | 0.78 | 0.78 (1) | 0.78 (1) |
| David Andes *et al*. (2011) | 40 | 150 | 1.07 | 0.93 (0.87) | 1.30 (1.22) |
| Emilio Maseda *et al*. (2014) | 40 | 150 | 0.88 | 0.58 (0.66) | 1.56 (1.77) |
| Vincent Jullien *et al*. (2017) | 40 | 150 | 1.20 | 0.96 (0.80) | 1.82 (1.51) |
| E. W. Muilwijk *et al*. (2018)** |  | 39.67 | 83.34 | 1.01 | 0.77 (0.76) | 1.34 (1.33) |
| Roeland E. Wasmann *et al*. (2019) | 40 | 150 | 0.69 | 0.46 (0.66) | 1.21 (1.76) |
| Didi Bury *et al*. (2022b)** | 39.67 | 83.34 | 1.02 | 0.78 (0.76) | 1.35 (1.33) |
| Kenji Tabata *et al*. (2006) | Children:PLT (104/μL) | 1.8 | 48.6 | 0.16 | 0.14 (0.91) | 0.18 (1.15) |
| Kenji Tabata *et al*. (2006) | Adult:PLT (104/μL) | 0.3 | 74.5 | 0.47 | 0.45 (0.95) | 0.54 (1.14) |
| Zhong Shubai *et al*. (2021) | ALT (U/L) | 8 | 200 | 0.58 | 0.22 (0.38) | 0.72 (1.24) |
| William W. Hope *et al*. (2015) | AST (U/L) | 3 | 340 | 0.48 | 0.41 (0.85） | 0.55 (1.14) |
| William W. Hope *et al*. (2015) | TBIL (μmol/L) | 4.5 | 42.2 | 0.46 | 0.43 (0.94) | 0.49 (1.05) |
| Silke Gastine *et al*. (2019) *** | TBIL≤68.4 (μmol/L) | 0 | 1 | 1.56 | 1.23 (0.79) | 1.56 (1.00) |
| Vincent Jullien *et al*. (2017)*** | ALB≤25 (g/L) | 0 | 1 | 1.37 | 1.37 (1.00) | 1.56 (1.14) |
| Vincent Jullien *et al*. (2017)*** | SOFA≥0 | 0 | 1 | 1.37 | 1.03 (0.75) | 1.37 (1.00) |

*Ratio refers to the effect of the identified covariates on CL in each study, and calculated by the following equation:

** BW was transferred to FFM before calculation; *** For binary covariates like SOFA, 0 for SOFA ≥10 and 1 for SOFA<10 were used. FFM, free-fat mass; ALT, alanine amino transferase; AST, aspartate aminotransferase; PLT, platelet count; TBILI, total bilirubin; ALB, albumin; SOFA, Sepsis-related organ failure assessment score.
